# Supplementary material
Source: publisher figshare collection journal article supplement (https://frontiersin.figshare.com/ndownloader/files/10967033)
Supplement: Supplementary file [file 10967033]

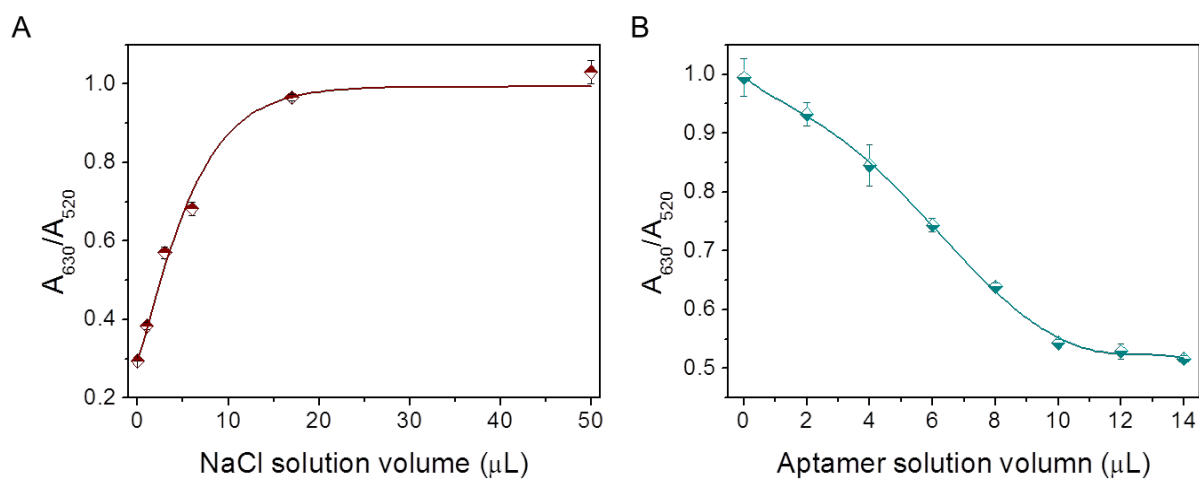

**Figure S1:** Optimization of the OTA detection conditions. A: Optimization of the volume of the 0.5 M NaCl solution; B: Optimization of the volume of the 1  $\mu\text{M}$  OTA aptamer solution.
